# Supplementary material
Source: publisher site journal article supplement (https://www.dovepress.com/article/441536)
Supplement: Supplementary file 1 [file get_supplementary_file.php]

# **Appendix**

**Appendix (Item 1): Exclusion table of literature and corresponding reference list**

| **Exclusion reason (number of articles)** | **References** |
| --- | --- |
| Abstract only | [1-17] |
| Full text not available | [18-21] |
| No data o Pulmonary TB among immigrant | [22-26] |
| No data on TB burden | [27-35] |
| Non-pertinent publication type | [36-46] |
| Not in immigrant population only | [47-51] |
| Screening effectiveness analysis | [52-55] |
| Site of TB not mentioned | [56-61] |
| TB study with different objective | [62-69] |
| Wrong study design | [70-73] |
| Wrong study duration | [74-75] |

1. Browne, C., Munang, M., Evans, J., Smith, E., Khanom, S., Hawkey, P., Kunst, H., Welch, S., & Dedicoat, M. (2013). P99 Impact of TB cluster investigation in a new migrant community. Thorax, 68(Suppl 3), A119.3-A119. https://doi.org/10.1136/thoraxjnl-2013-204457.249
2. Chaloner, J. H., & Ormerod, L. P. (2002). Assessment of the impact of BCG vaccination on tuberculosis incidence in south Asian adult immigrants. Communicable Disease and Public Health, 5(4), 338–340. https://pubmed.ncbi.nlm.nih.gov/12564256/
3. Collinson, S., & Ward, R. (2010). A nurse-led response to unmet needs of homeless migrants in inner London. British Journal of Nursing, 19(1), 36–41. https://doi.org/10.12968/bjon.2010.19.1.45910
4. Conaty, S. J., Dart, S., Hayward, A. C., & Lipman, M. C. (2004). Reasons for low reported treatment success in notified tuberculosis patients from a London hospital according to new outcome reporting. Communicable Disease and Public Health, 7(1), 73–76. https://pubmed.ncbi.nlm.nih.gov/15137286/
5. Coombes, N., Kazmi, S. M. H., Mackin, S., Bisacre, C., & Davies, P. (2012). Tuberculosis (TB) notifications in healthcare workers (HCW) in Liverpool, UK. European Respiratory Journal, 40(Suppl 56). https://erj.ersjournals.com/content/40/Suppl_56/P2861
6. Craig, C., Cade, R., & Ahmed, R. (2017). Are TB services in England adhering to new NICE guidelines on screening for latent TB? European Respiratory Journal, 50(suppl 61). https://doi.org/10.1183/1393003.congress-2017.PA2689
7. kruijshaar, M. E., Abubakar, I., Crofts, J. P., & Lipman, M. (2009). Tuberculosis in London and Other English Cities: Is the Capital the Special One?. A106-A106. Paper presented at Winter Meeting of the British-Thoracic-Society, London, England.
8. Li, M., Schwec, M., Clerk, N., & Antunes, G. (2018). Occupational tuberculosis screening for healthcare workers in a UK centre. European Respiratory Journal, 52(suppl 62). https://doi.org/10.1183/13993003.congress-2018.PA3876
9. Masih, I. (2010). Prevalence Of Tuberculosis And Compliance With Anti-tuberclosis Therapy During April 07-April 08 In Northern Ireland. B48. TUBERCULOSIS and NON-TUBERCULOUS MYCOBACTERIUM: TREATMENT OUTCOME STUDIES and CASE REPORTS. https://doi.org/10.1164/ajrccm-conference.2010.181.1_meetingabstracts.a3167
10. Panchal, R. K., Haldar, P., & Woltmann, G. (2011). P58 Indices of TB risk can help stratify recent immigrants registering with a GP for targeted screening. Thorax, 66(Suppl 4), A92–A92. https://doi.org/10.1136/thoraxjnl-2011-201054c.58
11. Pareek, M., Bond, M., Shorey, J., Seneviratne, S., Lalvani, A., Kon, O. M., Kruijshaar, M. E., Lipman, M., Moore, J., & Abubakar, I. (n.d.). S38 COMMUNITY-BASED EVALUATION OF IMMIGRANT TB SCREENING USING INTERFERON GAMMA RELEASE ASSAYS AND TUBERCULIN SKIN TESTING: YIELDS AND COST-EFFECTIVENESS. 1.
12. Pareek, M., Watson, J. P., Kon, O. M., Woltmann, G., & Lalvani, A. (2010). S5 Prevalence of latent tuberculosis infection in immigrants to the UK: Findings from a multi-centre study. Thorax, 65(Suppl 4), A5–A6. https://doi.org/10.1136/thx.2010.150912.5
13. Ricketts, W. M., Anderson, L. F., & White, V. L. C. (2013). P93 Social risk factors associated with tuberculosis in a high incidence area of the UK. Thorax, 68(Suppl 3), A116–A117. https://doi.org/10.1136/thoraxjnl-2013-204457.243
14. Shetty, N., Shemko, M., & Abbas, A. (2004). Knowledge, attitudes and practices regarding tuberculosis among immigrants of Somalian ethnic origin in London: a cross-sectional study. Communicable Disease and Public Health, 7(1), 77–82. https://pubmed.ncbi.nlm.nih.gov/15137287/
15. Tunbridge, A., MacFarlane, J., Mather, J., & Chapman, A. (2011). Improving infection screening for international immigrants Anne J Tunbridge, Joan MacFarlane, Julie Mather, Ann LN Chapman. Journal of Infection, 63(6), e32–e33. https://doi.org/10.1016/j.jinf.2011.04.066
16. Underwood, B. R., White, V. L. C., Moore-Gillon, J. C., Baker, T., & Law, M. (2003). Contact tracing and population screening for tuberculosis – who should be assessed? Journal of Public Health Medicine, 25(1), 59–61. https://www.jstor.org/stable/45161892
17. Woltmann, G., Haldar, P., Free, R., Thuraisingam, H., & Barer, M. (2010). 5 Year Cohort Analysis Of Foreign Born Tb Notifications In UK Centre. C53. EPIDEMIOLOGY of LATENT and ACTIVE TUBERCULOSIS. https://doi.org/10.1164/ajrccm-conference.2010.181.1_meetingabstracts.a4756
18. Burman, M., Copas, A., Zenner, D., Hickson, V., Gosce, L., Trathen, D., Ashcroft, R., Martineau, A. R., Abubakar, I., Griffiths, C., & Kunst, H. (2019). Protocol for a cluster randomised control trial evaluating the efficacy and safety of treatment for latent tuberculosis infection in recent migrants within primary care: The CATAPuLT trial. BMC Public Health, 19(1), 1598. https://doi.org/10.1186/s12889-019-7983-7
19. Gissing, S., & Bindra, R. (2018). Diagnostic delay in tuberculosis in Yorkshire & Humber, UK: 2013-16 data. Tuberculosis. https://doi.org/10.1183/13993003.CONGRESS-2018.PA5267
20. Pareek, M., Eborall, H. C., Wobi, F., Ellis, K. S., Kontopantelis, E., Zhang, F., Baggaley, R., Hollingsworth, T. D., Baines, D., Patel, H., Haldar, P., Patel, M., Stephenson, I., Browne, I., Gill, P., Kapur, R., Farooqi, A., Abubakar, I., & Griffiths, C. (2019). Community-based testing of migrants for infectious diseases (COMBAT-ID): Impact, acceptability and cost-effectiveness of identifying infectious diseases among migrants in primary care: protocol for an interrupted time-series, qualitative and health economic analysis. BMJ Open, 9(3), e029188. https://doi.org/10.1136/bmjopen-2019-029188
21. Simpson, T., Stephenson, E., & Palchaudhuri, P. (2013). A study of tuberculosis in an expatriate Nepalese community in South-East London. European Respiratory Journal, 42(Suppl 57). https://erj.ersjournals.com/content/42/Suppl_57/P1605
22. Berrocal-Almanza, L. C., Harris, R., Lalor, M. K., Muzyamba, M. C., Were, J., O’Connell, A.-M., Mirza, A., Kon, O.-M., Lalvani, A., & Zenner, D. (2019). Effectiveness of pre-entry active tuberculosis and post-entry latent tuberculosis screening in new entrants to the UK: A retrospective, population-based cohort study. The Lancet Infectious Diseases, 19(11), 1191–1201. https://doi.org/10.1016/S1473-3099(19)30260-9
23. Davidson, J. A., Lalor, M. K., Anderson, L. F., Tamne, S., Abubakar, I., & Thomas, H. L. (2017). TB in healthcare workers in the UK: A cohort analysis 2009–2013. Thorax, 72(7), 654–659. https://doi.org/10.1136/thoraxjnl-2015-208026
24. Hanway, A., Comiskey, C. M., Tobin, K., & O’Toole, R. F. (2016). Relating annual migration from high tuberculosis burden country of origin to changes in foreign-born tuberculosis notification rates in low-medium incidence European countries. Tuberculosis, 101, 67–74. https://doi.org/10.1016/j.tube.2016.07.019
25. Nnadi, C. D., Anderson, L. F., Armstrong, L. R., Stagg, H. R., Pedrazzoli, D., Pratt, R., Heilig, C. M., Abubakar, I., & Moonan, P. K. (2016). Mind the gap: TB trends in the USA and the UK, 2000–2011. Thorax, 71(4), 356–363. https://doi.org/10.1136/thoraxjnl-2015-207915
26. White, Z., Painter, J., Douglas, P., Abubakar, I., Njoo, H., Archibald, C., Halverson, J., Robson, J., & Posey, D. L. (2017). Immigrant Arrival and Tuberculosis among Large Immigrant- and Refugee-Receiving Countries, 2005–2009. Tuberculosis Research and Treatment, 2017, 8567893. https://doi.org/10.1155/2017/8567893
27. Afshar, B., Carless, J., Roche, A., Balasegaram, S., & Anderson, C. (2019). Surveillance of tuberculosis (TB) cases attributable to relapse or reinfection in London, 2002-2015. PLOS ONE, 14(2), e0211972. https://doi.org/10.1371/journal.pone.0211972
28. Appleton, S. C., Connell, D. W., Singanayagam, A., Bradley, P., Pan, D., Sanderson, F., Cleaver, B., Rahman, A., & Kon, O. M. (2017). Evaluation of prediagnosis emergency department presentations in patients with active tuberculosis: The role of chest radiography, risk factors and symptoms. BMJ Open Respiratory Research, 4(1), e000154. https://doi.org/10.1136/bmjresp-2016-000154
29. Berrocal-Almanza, L. C., Botticello, J., Piotrowski, H., Karnani, N., Kon, O.-M., Lalvani, A., & Zenner, D. (n.d.). Engaging with civil society to improve access to LTBI screening for new migrants in England: A qualitative study. 9.
30. Coker, R. (2006). Tuberculosis screening in migrants in selected European countries shows wide disparities. European Respiratory Journal, 27(4), 801–807. https://doi.org/10.1183/09031936.06.00104305
31. Cooke, G., Hargreaves, S., Natkunarajah, J., Sandhu, G., Dhasmana, D., Eliahoo, J., Holmes, A., & Friedland, J. S. (2007). Impact on and use of an inner-city London Infectious Diseases Department by international migrants: A questionnaire survey. BMC Health Services Research, 7(1), 113. https://doi.org/10.1186/1472-6963-7-113
32. Finnerty, F., George, S., & Eziefula, A. C. (2018). The health of recent migrants from resource-poor countries. Medicine, 46(1), 66–71. https://doi.org/10.1016/j.mpmed.2017.10.003
33. Munang, M. L., Browne, C., Khanom, S., Evans, J. T., Smith, E. G., Hawkey, P. M., Kunst, H., Welch, S. B., & Dedicoat, M. J. (2015). Tuberculosis Microepidemics among Dispersed Migrants, Birmingham, UK, 2004–2013. Emerging Infectious Diseases, 21(3), 524–527. https://doi.org/10.3201/eid2103.140209
34. Pareek, M., Abubakar, I., White, P. J., Garnett, G. P., & Lalvani, A. (2011). Tuberculosis screening of migrants to low-burden nations: Insights from evaluation of UK practice. European Respiratory Journal, 37(5), 1175–1182. https://doi.org/10.1183/09031936.00105810
35. Walker, C.-L., Duffield, K., Kaur, H., Dedicoat, M., & Gajraj, R. (2018). Acceptability of latent tuberculosis testing of migrants in a college environment in England. Public Health, 158, 55–60. https://doi.org/10.1016/j.puhe.2018.02.004
36. Anderson, C., Anderson, S. R., Maguire, H., Hayward, A. C., & Story, A. (2016). Tuberculosis in London: The convergence of clinical and social complexity. European Respiratory Journal, 48(4), 1233–1236. https://doi.org/10.1183/13993003.00749-2016
37. Berrocal-Almanza, L. C., OConnell, A. M., Muzyamba, M. C., Mirza, A., Lalor, M., Lalvani, A., & Zenner, D. (2017). S30 Is the new national ltbi screening program reaching the target population? a population-based cohort study. Thorax, 72(Suppl 3), A21–A22. https://doi.org/10.1136/thoraxjnl-2017-210983.36
38. Koh, G., Hawthorne, G., Kunst, H., & Dedicoat, M. (2012). P49 Tuberculosis in Birmingham is Seasonal. Thorax, 67(Suppl 2), A84–A85. https://www.academia.edu/35457779/P49_Tuberculosis_in_Birmingham_is_Seasonal
39. McNerney, R., Ferrara, G., O’Grady, J., Maeurer, M., & Zumla, A. (2011). Screening of immigrants in the UK for latent tuberculosis. Expert Review of Respiratory Medicine, 5(4), 483–486. https://doi.org/10.1586/ers.11.45
40. Pealing, L., Moore, D., & Zenner, D. (2013). The resurgence of tuberculosis and the implications for primary care. British Journal of General Practice, 63(612), 344–345. https://doi.org/10.3399/bjgp13X669077
41. Potter, J., Burman, M., Tweed, C., Vanghuela, D., White, V., Swinglehurst, D., Griffiths, C., & Kunst, H. (2017). S27 Have recent changes to health policies increased diagnostic delay amongst migrant patients with active tb? TB: From Screening to Compliance. https://doi.org/10.1136/thoraxjnl-2017-210983.33
42. Schwappach, A., Seddon, O., Weeks, L., Hester, Y., & Campbell, I. (2018). S151 Does movement between treatment centres affect whether asylum seekers with latent tuberculosis (TB) infection complete treatment? Thorax, 73(Suppl 4), A94–A94. https://doi.org/10.1136/thorax-2018-212555.157
43. van der Werf, M. J., & Kramarz, P. (2016). Tackling tuberculosis in migrants. The Lancet Infectious Diseases, 16(8), 877–878. https://doi.org/10.1016/S1473-3099(16)00148-1
44. Wagner, K., & Jones, J. (2011). Caring for migrant patients in the UK: How the Migrant Health Guide can help. The British Journal of General Practice, 61(590), 546–547. https://doi.org/10.3399/bjgp11X593758
45. Wang, Y., Taegtmeyer, M., Squire, S. B., & Theobald, S. J. (2008). Review Series: The Politics of TB: TB control services need tailoring for new arrivals, not vice versa. Chronic Respiratory Disease, 5(1), 49–51. https://doi.org/10.1177/1479972307086173
46. Werf, M. J. van der, & Zellweger, J. P. (2016). Impact of migration on tuberculosis epidemiology and control in the EU/EEA. Eurosurveillance, 21(12), 30174. https://doi.org/10.2807/1560-7917.ES.2016.21.12.30174
47. Antoine, D., Maguire, H., & Story, A. (2006). Epidemiology and response to the growing problem of tuberculosis in London. Euro Surveillance : Bulletin Européen Sur Les Maladies Transmissibles = European Communicable Disease Bulletin, 11, 25–28. https://doi.org/10.2807/esm.11.03.00609-en
48. ANYAMA, N., BRACEBRIDGE, S., BLACK, C., NIGGEBRUGGE, A., & GRIFFIN, S. J. (2007). What happens to people diagnosed with tuberculosis? A population-based cohort. Epidemiology and Infection, 135(7), 1069–1076. https://doi.org/10.1017/S0950268807007996
49. Craig, G. M., & Zumla, A. (2015). The social context of tuberculosis treatment in urban risk groups in the United Kingdom: A qualitative interview study. International Journal of Infectious Diseases, 32, 105–110. https://doi.org/10.1016/j.ijid.2015.01.007
50. Pollock, K. G., McDonald, E., Smith-Palmer, A., Johnston, F., & Ahmed, S. (2017). Tuberculosis in healthcare workers, Scotland. Scottish Medical Journal, 62(3), 101–103. https://doi.org/10.1177/0036933017727963
51. Walker, T. M., Lalor, M. K., Broda, A., Ortega, L. S., Morgan, M., Parker, L., Churchill, S., Bennett, K., Golubchik, T., Giess, A. P., Del Ojo Elias, C., Jeffery, K. J., Bowler, I. C. J. W., Laurenson, I. F., Barrett, A., Drobniewski, F., McCarthy, N. D., Anderson, L. F., Abubakar, I., … Conlon, C. P. (2014). Assessment of Mycobacterium tuberculosis transmission in Oxfordshire, UK, 2007–12, with whole pathogen genome sequences: An observational study. The Lancet. Respiratory Medicine, 2(4), 285–292. https://doi.org/10.1016/S2213-2600(14)70027-X
52. Brewin, P., Jones, A., Kelly, M., McDonald, M., Beasley, E., Sturdy, P., Bothamley, G., & Griffiths, C. (2006). Is screening for tuberculosis acceptable to immigrants? A qualitative study. Journal of Public Health, 28(3), 253–260. https://doi.org/10.1093/pubmed/fdl031
53. Hardy, A. B., Varma, R., Collyns, T., Moffitt, S. J., Mullarkey, C., & Watson, J. P. (2010). Cost-effectiveness of the NICE guidelines for screening for latent tuberculosis infection: The QuantiFERON-TB Gold IGRA alone is more cost-effective for immigrants from high burden countries. Thorax, 65(2), 178–180. https://doi.org/10.1136/thx.2009.119677
54. Kruijshaar, M. E., Abubakar, I., Stagg, H. R., Pedrazzoli, D., & Lipman, M. (2013). Migration and tuberculosis in the UK: Targeting screening for latent infection to those at greatest risk of disease. Thorax, 68(12), 1172–1174. https://doi.org/10.1136/thoraxjnl-2013-203254
55. Pareek, M., Bond, M., Shorey, J., Seneviratne, S., Guy, M., White, P., Lalvani, A., & Kon, O. M. (2013). Community-based evaluation of immigrant tuberculosis screening using interferon γ release assays and tuberculin skin testing: Observational study and economic analysis. Thorax, 68(3), 230–239. https://doi.org/10.1136/thoraxjnl-2011-201542
56. Boudville, D. A., Joshi, R., & Rijkers, G. T. (2020). Migration and tuberculosis in Europe. Journal of Clinical Tuberculosis and Other Mycobacterial Diseases, 18, 100143. https://doi.org/10.1016/j.jctube.2020.100143
57. Hargreaves, S., Seedat, F., Car, J., Escombe, R., Hasan, S., Eliahoo, J., & Friedland, J. S. (2014). Screening for latent TB, HIV, and hepatitis B/C in new migrants in a high prevalence area of London, UK: A cross-sectional study. BMC Infectious Diseases, 14, 657. https://doi.org/10.1186/s12879-014-0657-2
58. Pareek, M., Watson, J. P., Ormerod, L. P., Kon, O. M., Woltmann, G., White, P. J., Abubakar, I., & Lalvani, A. (2011). Screening of immigrants in the UK for imported latent tuberculosis: A multicentre cohort study and cost-effectiveness analysis. The Lancet. Infectious Diseases, 11(6), 435–444. https://doi.org/10.1016/S1473-3099(11)70069-X
59. Usdin, M., Dedicoat, M., Gajraj, R., Harrison, P., Kaur, H., Duffield, K., Walker, C.-L., Akram, Y., Aiyedun, V., Mohamed, H., & Zenner, D. (n.d.). Latent tuberculous screening of recent migrants attending language classes: A cohort study and cost analysis. 8.
60. Wagner, K. S., Lawrence, J., Anderson, L., Yin, Z., Delpech, V., Chiodini, P. L., Redman, C., & Jones, J. (2014). Migrant health and infectious diseases in the UK: Findings from the last 10 years of surveillance. Journal of Public Health, 36(1), 28–35. https://doi.org/10.1093/pubmed/fdt021
61. Zenner, D., Loutet, M. G., Harris, R., Wilson, S., & Ormerod, L. P. (2017). Evaluating 17 years of latent tuberculosis infection screening in north-west England: A retrospective cohort study of reactivation. European Respiratory Journal, 50(1), 1602505. https://doi.org/10.1183/13993003.02505-2016
62. French, C. E., Kruijshaar, M. E., Jones, J. A., & Abubakar, I. (2009). The influence of socio-economic deprivation on tuberculosis treatment delays in England, 2000–2005. Epidemiology & Infection, 137(4), 591–596. https://doi.org/10.1017/S0950268808001118
63. Nguipdop-Djomo, P., Rodrigues, L. C., Abubakar, I., & Mangtani, P. (2020). Small-area level socio-economic deprivation and tuberculosis rates in England: An ecological analysis of tuberculosis notifications between 2008 and 2012. PLOS ONE, 15(10), e0240879. https://doi.org/10.1371/journal.pone.0240879
64. Panchal, R. K., Haldar, P., & Woltmann, G. (2011). P59 Differing patterns of new immigrant GP registration among ethnic subgroups determine the importance of additional strategies for models of new immigrant screening. Thorax, 66(Suppl 4), A92–A92. https://doi.org/10.1136/thoraxjnl-2011-201054c.59
65. Potter, J. L., Burman, M., Tweed, C. D., Vaghela, D., Kunst, H., Swinglehurst, D., & Griffiths, C. J. (2020). The NHS visitor and migrant cost recovery programme – a threat to health? BMC Public Health, 20(1), 407. https://doi.org/10.1186/s12889-020-08524-9
66. Potter, J. L., Inamdar, L., Okereke, E., Collinson, S., Dukes, R., & Mandelbaum, M. (2016). Support of vulnerable patients throughout TB treatment in the UK. Journal of Public Health, 38(2), 391–395. https://doi.org/10.1093/pubmed/fdv052
67. Roberts, D. J., Mannes, T., Verlander, N. Q., & Anderson, C. (2020). Factors associated with delay in treatment initiation for pulmonary tuberculosis. ERJ Open Research, 6(1), 00161–02019. https://doi.org/10.1183/23120541.00161-2019
68. Stagg, H. R., Jones, J., Bickler, G., & Abubakar, I. (2012). Poor uptake of primary healthcare registration among recent entrants to the UK: A retrospective cohort study. BMJ Open, 2(4), e001453. https://doi.org/10.1136/bmjopen-2012-001453
69. Thomas, H. L., Harris, R. J., Muzyamba, M. C., Davidson, J. A., Lalor, M. K., Campbell, C. N. J., Anderson, S. R., & Zenner, D. (2018). Reduction in tuberculosis incidence in the UK from 2011 to 2015: A population-based study. Thorax, 73(8), 769–775. https://doi.org/10.1136/thoraxjnl-2017-211074
70. Douglas, P., Posey, D. L., Zenner, D., Robson, J., Abubakar, I., & Giovinazzo, G. (n.d.). Capacity strengthening through pre-migration tuberculosis screening programmes: IRHWG experiences. 10.
71. Hayward, S., Harding, R. M., McShane, H., & Tanner, R. (2018). Factors influencing the higher incidence of tuberculosis among migrants and ethnic minorities in the UK. F1000Research, 7, 461. https://doi.org/10.12688/f1000research.14476.2
72. Lalvani, A., & Pareek, M. (2012). Immigrant screening for TB: A missed opportunity to improve TB control in the United Kingdom. Pathogens and Global Health, 106(1), 5–7. https://doi.org/10.1179/204777312X13305103762501
73. Potter, J. (2017). Border control in a healthcare setting is not in the public’s best interests. Journal of Public Health, 39(2), 219–220. https://doi.org/10.1093/pubmed/fdx051
74. Brown III, J. W. (1998). The International Journal of Tuberculosis and Lung Disease. JAMA: The Journal of the American Medical Association, 280(13), 1200-a-1200. https://doi.org/10.1001/jama.280.13.1200-a
75. Choudhury, I. W., West, C. R., & Ormerod, L. P. (2014). The outcome of a cohort of tuberculin-positive predominantly South Asian new entrants aged 16-34 to the UK: Blackburn 1989-2001. Journal of Public Health, 36(3), 390–395. https://doi.org/10.1093/pubmed/fdt110

## **Appendix (Item 2): Exclusion reasons during the title and abstract screening**

The main reason for the exclusion of the articles during the title and abstract screening were;

- Study about other non-pulmonary types of TB
- TB study with different objectives (Comparison of the different diagnostic tests, cost-effectiveness, treatment outcomes, etc.)
- Irrelevant to Pulmonary TB (Pulmonary TB not discussed)
- Wrong study population (Pregnant women, Prisoners)
- Wrong study design (Reviews, meta-analysis)
- Non-pertinent publication type (Editorial Opinions, conferences Abstract)
- Full text not available
- TB study with co-morbidities (HIV, Diabetes)
- Outside date range (studies published before 2000)

## **Appendix (Item 3): PRISMA Checklist**

| **Section and Topic** | **Item #** | **Checklist item** | **Reported on page #** |
| --- | --- | --- | --- |
| **TITLE** | | |  |
| Title | 1 | Identify the report as a systematic review. | 1 |
| **ABSTRACT** | | |  |
| Abstract | 2 | See the PRISMA 2020 for Abstracts checklist. | 6 |
| **INTRODUCTION** | | |  |
| Rationale | 3 | Describe the rationale for the review in the context of existing knowledge. | 7-10 |
| Objectives | 4 | Provide an explicit statement of the objective(s) or question(s) the review addresses. | 11 |
| **METHODS** | | |  |
| Eligibility criteria | 5 | Specify the inclusion and exclusion criteria for the review and how studies were grouped for the syntheses. | 12 |
| Information sources | 6 | Specify all databases, registers, websites, organisations, reference lists and other sources searched or consulted to identify studies. Specify the date when each source was last searched or consulted. | 13 |
| Search strategy | 7 | Present the full search strategies for all databases, registers and websites, including any filters and limits used. | 13-14 |
| Selection process | 8 | Specify the methods used to decide whether a study met the inclusion criteria of the review, including how many reviewers screened each record and each report retrieved, whether they worked independently, and if applicable, details of automation tools used in the process. | 15 |
| Data collection process | 9 | Specify the methods used to collect data from reports, including how many reviewers collected data from each report, whether they worked independently, any processes for obtaining or confirming data from study investigators, and if applicable, details of automation tools used in the process. | 15 |
| Data items | 10a | List and define all outcomes for which data were sought. Specify whether all results that were compatible with each outcome domain in each study were sought (e.g. for all measures, time points, analyses), and if not, the methods used to decide which results to collect. | 12 |
| 10b | List and define all other variables for which data were sought (e.g. participant and intervention characteristics, funding sources). Describe any assumptions made about any missing or unclear information. | N/A |
| Study risk of bias assessment | 11 | Specify the methods used to assess risk of bias in the included studies, including details of the tool(s) used, how many reviewers assessed each study and whether they worked independently, and if applicable, details of automation tools used in the process. | 16 |
| Effect measures | 12 | Specify for each outcome the effect measure(s) (e.g. risk ratio, mean difference) used in the synthesis or presentation of results. | N/A |
| Synthesis methods | 13a | Describe the processes used to decide which studies were eligible for each synthesis (e.g. tabulating the study intervention characteristics and comparing against the planned groups for each synthesis (item #5)). | N/A |
| 13b | Describe any methods required to prepare the data for presentation or synthesis, such as handling of missing summary statistics, or data conversions. | 15 |
| 13c | Describe any methods used to tabulate or visually display results of individual studies and syntheses. | 15 |
| 13d | Describe any methods used to synthesize results and provide a rationale for the choice(s). If meta-analysis was performed, describe the model(s), method(s) to identify the presence and extent of statistical heterogeneity, and software package(s) used. | N/A |
| 13e | Describe any methods used to explore possible causes of heterogeneity among study results (e.g. subgroup analysis, meta-regression). | N/A |
| 13f | Describe any sensitivity analyses conducted to assess robustness of the synthesized results. |  |
| Reporting bias assessment | 14 | Describe any methods used to assess risk of bias due to missing results in a synthesis (arising from reporting biases). | 15 |
| Certainty assessment | 15 | Describe any methods used to assess certainty (or confidence) in the body of evidence for an outcome. | N/A |
| **RESULTS** | | |  |
| Study selection | 16a | Describe the results of the search and selection process, from the number of records identified in the search to the number of studies included in the review, ideally using a flow diagram. | 17 |
| 16b | Cite studies that might appear to meet the inclusion criteria, but which were excluded, and explain why they were excluded. | N/A |
| Study characteristics | 17 | Cite each included study and present its characteristics. | 18, Table 3 |
| Risk of bias in studies | 18 | Present assessments of risk of bias for each included study. | 20 , Appendix 1 |
| Results of individual studies | 19 | For all outcomes, present, for each study: (a) summary statistics for each group (where appropriate) and (b) an effect estimate and its precision (e.g. confidence/credible interval), ideally using structured tables or plots. | 20-25 |
| Results of syntheses | 20a | For each synthesis, briefly summarise the characteristics and risk of bias among contributing studies. | N/A |
| 20b | Present results of all statistical syntheses conducted. If meta-analysis was done, present for each the summary estimate and its precision (e.g. confidence/credible interval) and measures of statistical heterogeneity. If comparing groups, describe the direction of the effect. | N/A |
| 20c | Present results of all investigations of possible causes of heterogeneity among study results. | N/A |
| 20d | Present results of all sensitivity analyses conducted to assess the robustness of the synthesized results. | N/A |
| Reporting biases | 21 | Present assessments of risk of bias due to missing results (arising from reporting biases) for each synthesis assessed. | N/A |
| Certainty of evidence | 22 | Present assessments of certainty (or confidence) in the body of evidence for each outcome assessed. | N/A |
| **DISCUSSION** | | |  |
| Discussion | 23a | Provide a general interpretation of the results in the context of other evidence. | 27 |
| 23b | Discuss any limitations of the evidence included in the review. | 32 |
| 23c | Discuss any limitations of the review processes used. | 32 |
| 23d | Discuss implications of the results for practice, policy, and future research. | 32-33 |
| **OTHER INFORMATION** | | |  |
| Registration and protocol | 24a | Provide registration information for the review, including register name and registration number, or state that the review was not registered. | Not Registered |
| 24b | Indicate where the review protocol can be accessed, or state that a protocol was not prepared. | N/A |
| 24c | Describe and explain any amendments to information provided at registration or in the protocol. | N/A |
| Support | 25 | Describe sources of financial or non-financial support for the review, and the role of the funders or sponsors in the review. | N/A |
| Competing interests | 26 | Declare any competing interests of review authors. | N/A |
| Availability of data, code and other materials | 27 | Report which of the following are publicly available and where they can be found: template data collection forms; data extracted from included studies; data used for all analyses; analytic code; any other materials used in the review. | N/A |

*From:*  Page MJ, McKenzie JE, Bossuyt PM, Boutron I, Hoffmann TC, Mulrow CD, et al. The PRISMA 2020 statement: an updated guideline for reporting systematic reviews. BMJ 2021;372:n71. doi: 10.1136/bmj.n71

## **Appendix (Item 4): Assessment of risk of bias according to the Joanna Briggs Institute Critical Appraisal Tool.**

| **Study** | Q1 | Q2 | Q3 | Q4 | Q5 | Q6 | Q7 | Q8 | Q9 | Q10 | Q11 | % yes | Risk |
| --- | --- | --- | --- | --- | --- | --- | --- | --- | --- | --- | --- | --- | --- |
| **Cohort Studies** |  |  |  |  |  |  |  |  |  |  |  |  |  |
| (Berrocal-Almanza et al., 2022)6 | ✓ | ✓ | ✓ | ✓ | ✓ | ✗ | ✓ | ✓ | ✓ | ✗ | ✓ | 82%(9/11) | Low |
| (Loutet et al., 2018)26 | ✓ | ✓ | ✓ | ✓ | ✓ | ✗ | ✓ | ✓ | ✓ | N/A | ✓ | 90% (9/10) | Low |
| (Severi, 2016)31 | ✓ | ✓ | ✓ | ✗ | ✗ | ? | ✓ | N/A | N/A | N/A | ✓ | 78.5% (5.5/7) | Low |
| (Panchal et al., 2013)30 | ✓ | ? | ✓ | ✓ | ? | ✓ | ✓ | N/A | N/A | N/A | ✓ | 87.5%(7/8) | Low |
| (Aldridge et al., 2016b)3 | N/A | ✓ | ✓ | N/A | N/A | ✓ | ✓ | ✓ | ✓ | N/A | ✓ | 100% (7/7) | Low |
| **Cross Sectional Studies** |  |  |  |  |  |  |  |  |  |  |  |  |  |
| (Crofts et al., 2008)28 | ? | ? | N/A | ✓ | ✓ | ? | ✓ | ✓ |  |  |  | 78.5% (5.5/7) | Low |
| (Crawshaw et al., 2018)18 | ✓ | ✓ | N/A | ✓ | ✗ | ✗ | ✓ | ✓ |  |  |  | 62.5% (5/8) | Moderate |
| (Aldridge et al., 2016a)1 | ✓ | ✓ | ✓ | ✓ | ✓ | ? | ✓ | ✓ |  |  |  | 94% (7.5/8) | Low |
| (Cegolon et al., 2010)12 | ✗ | ✗ | N/A | ✓ | ✓ | ? | ✓ | ✓ |  |  |  | 64% (4.5/7) | Moderate |
| (French et al., 2007)25 | ✗ | ✓ | N/A | ✓ | ✗ | ✗ | ✓ | ✓ |  |  |  | 57% (4/7) | Moderate |
| (Harling et al., 2007)29 | ✓ | ✓ | ✓ | ✓ | N/A | N/A | ✓ | ✓ |  |  |  | 100% (6/6) | Low |
| **Qualitative Study** |  |  |  |  |  |  |  |  |  |  |  |  |  |
| (Humphreys et al., 2017)38 | ✓ | ✓ | ✓ | ✓ | ✓ | ✗ | ? | ✓ | ✗ | ✓ |  | 75% (7.5/10) | Low |
| (Seedat et al., 2014)54 | ? | ✓ | ✓ | ✓ | ✓ | ✗ | ✗ | ✓ | ✓ | ✓ |  | 75% (7.5/10) | Low |
| (Chinouya & Adeyanju, 2017)34 | ? | ✓ | ✓ | ✓ | ✓ | ? | ✓ | ✓ | ✓ | ✗ |  | 80% (8/10) | Low |

Studies included in this review were assessed for risk of bias according to JBI (Joanna Briggs Institute) Critical Appraisal Tool.

✓, indicates yes (1 point); ✗ indicates No (0 points); “?”, indicates unclear (0.5 points). Risk: The risk of bias was ranked as high when the study score was up to 49%, moderate when the study reached from 50 to 69%, and low when the study score reached more than 70%. N/A, not applicable.
